# Supplementary material for: Promoter nucleosome dynamics regulated by signalling through the CTD code
Source: eLife. 2015 Jun 22;4:e09008. doi: 10.7554/eLife.09008 (PMC4502402; doi:10.7554/eLife.09008)
Supplement: Figure 1—source data 1. — DOI: http://dx.doi.org/10.7554/eLife.09008.004 [file elife09008s001.xlsx]

## Sheet: Feuil1
lsk1	Gene ID	Gene name	Gene description	Biological category
	SPAC1071.07c	rps1502	40S ribosomal protein S15	translation
	SPAC10F6.16	mug134	endosulphine family protein	mRNA stabilization
	SPAC110.02	pds5	cohesin-associated protein Pds5	mitose (chromatids segregation + chromatin remodeling)
	SPAC11E3.01c	swr1	SNF2 family helicase Swr1	chromatin remodelling
	SPAC11G7.02	pub1	ubiquitin-protein ligase E3
	SPAC144.02	iec1	Ino80 complex subunit Iec1	chromatin remodelling
	SPAC1556.05c		CGR1 family	rRNA processing
	SPAC15A10.03c	rhp54	Rad54 homolog Rhp54	Meiosis/ chromatin remodeling/DNA repair and recombination
	SPAC16A10.03c		zinc finger protein Pep5/Vps11	protein transport
	SPAC16E8.01	shd1	cytoskeletal protein binding protein Sla1 family	cytosquelette
	SPAC1782.05	SPAC1782.05	phosphotyrosyl phosphatase activator homolog	regulation of cell cycle
	SPAC1783.06c	atg12	autophagy associated protein Atg12	ascospore formation/ autophagy
	SPAC17G8.13c	mst2	histone acetyltransferase Mst2	chromatin remodelling
	SPAC1851.03	ckb1	CK2 family regulatory subunit	regulation of transcription
	SPAC19B12.08	SPAC19B12.08	peptidase family C54	autophagy
	SPAC19D5.03	cid1	poly(A) polymerase Cid1	mRNA processing
	SPAC1D4.06c	csk1	cyclin-dependent kinase activating kinase Csk1	regulation of cell cycle
	SPAC1F7.01c	spt6	transcription elongation factor Spt6	regulation of transcription/ chromatin remodeling
	SPAC1F8.03c	str3	siderophore-iron transporter Str3	transmembrane transport
	SPAC227.04		autophagy C terminal domain family protein	autophagy
	SPAC22F8.12c	shf1	sequence orphan	chromatin silencing(H2B K ubiquitynalation)
	SPAC23C11.10	SPAC23C11.10	conserved eukaryotic protein
	SPAC23C11.15	pst2	Clr6 histone deacetylase complex subunit Pst2	chromatin remodelling
	SPAC23C4.06c	SPAC23C4.06c	methyltransferase
	SPAC23D3.09	arp42	SWI/SNF and RSC complex subunit Arp42	chromatin remodeling ( negative regulation of transcription)
	SPAC23E2.03c	ste7	meiotic suppressor protein Ste7	conjugaison/meiose
	SPAC25A8.02	SPAC25A8.02	sequence orphan
	SPAC25B8.18		mitochondrial electron carrier	oxydation-reduction process
	SPAC25H1.03	mug66	meiotically upregulated gene Mug66	meiosis
	SPAC25H1.03	mug66	meiotically upregulated gene Mug66	meisosis
	SPAC31A2.02	trm112	tRNA (guanine-N2-)-methyltransferase regulatory subunit Trm112	tRNA methylation
	SPAC31A2.11c	cuf1	Cu metalloregulatory transcription factor Cuf1	regulation of transcription
	SPAC31G5.09c	spk1	MAP kinase Spk1	signal transduction
	SPAC31G5.19	SPAC31G5.19	ATPase with bromodomain protein	chromatin remodeling
	SPAC3H1.12c	snt2	Lid2 complex subunit Snt2	chromatin remodelling
	SPAC3H8.02		sec14 cytosolic factor family	transport
	SPAC3H8.05c		conserved fungal protein	replication fork processing, recombinational repair,
	SPAC458.06	SPAC458.06	phosphoinositide binding protein	autophagy
	SPAC4A8.09c	cwf21	complexed with Cdc5 protein Cwf21	mRNA processing (splicing)
	SPAC4C5.02c	ryh1	GTPase Ryh1	protein transport
	SPAC4F10.04	SPAC4F10.04	protein phosphatase type 2A, intrinsic regulator	mitose/ DNA repair
	SPAC4F10.07c	atg13	autophagy associated protein Atg13	autophagy
	SPAC4G9.13c	vps26	retromer complex subunit Vps26	ascospores formation, vacuolar transport
	SPAC589.07c	SPAC589.07c	WD repeat protein Atg18	autophagy
	SPAC631.02	SPAC631.02	bromodomain protein	chromatin remodeling
	SPAC688.11	end4	Huntingtin-interacting protein homolog	regulation of cell cycle
	SPAC7D4.04	taf1	Taz1 interacting factor 1	autophagy
	SPAC7D4.12c	SPAC7D4.12c	DUF1212 family protein
	SPAC823.16c	mug179	WD repeat protein Mug179	autophagy, ascospore formation
	SPAC824.02	SPAC824.02	GPI inositol deacylase	protein transport
	SPAC824.04	SPAC824.04	WD repeat protein	mRNA processing
	SPAPJ698.02c	rps002	40S ribosomal protein S0B	rRNA export from nucleus+ rRNA processing/ translation
	SPBC1271.12	kes1	oxysterol binding protein	ergosterol biosynthesis
	SPBC12C2.02c	ste20	sterility protein Ste20	response to nitrogen starvation
	SPBC14C8.17c	SPBC14C8.17c	SAGA complex subunit Spt8	chromatin remodeling / regulation of transcription
	SPBC14F5.03c	kap123	karyopherin Kap123	transport
	SPBC15D4.07c	atg9	autophagy associated protein Atg9	autophagy
	SPBC1604.08c	imp1	importin alpha	nucleocytoplasmic transport/ regulation of mitotic cell cycle
	SPBC16D10.07c	sir2	Sir2 family histone deacetylase Sir2	chromatin remodelling
	SPBC1703.12	ubp9	ubiquitin C-terminal hydrolase Ubp9	cellular protein localisation, endocytose,...
	SPBC1711.03	SPBC1711.03	conserved eukaryotic protein	protein folding (RE)
	SPBC1778.01c	zuo1	zuotin	translation
	SPBC18H10.06c	swd2	COMPASS complex subunit Swd2	chromatin remodelling (histone H3-K4 methylation)
	SPBC18H10.19		human UVRAG (UV radiation resistance) homolog	autophagy
	SPBC1921.07c	sgf29	SAGA complex subunit Sgf29	chromatin remodelling
	SPBC19G7.04	SPBC19G7.04	HMG box protein	regulation of transcription
	SPBC1D7.03	mug80	cyclin Clg1	regulation of protein kinase
	SPBC1D7.05	byr2	MAP kinase kinase kinase Byr2	regulation of conjugation + sporulation
	SPBC21.05c	ral2	Ras guanyl-nucleotide exchange factor Ral2	regulation of conjugation
	SPBC27B12.11c		transcription factor	regulation of transcription from RNA Pol II
	SPBC28F2.10c	kap1	chromatin remodeling complex subunit Ngg1	chromatin remodeling
	SPBC30B4.04c	sol1	SWI/SNF complex subunit Sol1	chromatin remodelling + regulation of transcription
	SPBC30D10.13c	pdb1	pyruvate dehydrogenase e1 component beta subunit Pdb1	oxydation in mitochondrion
	SPBC31F10.13c	hip1	hira protein Hip1	chromatin remodelling
	SPBC32F12.05c	cwf12	complexed with Cdc5 protein Cwf12	nuclear mRNA splicing
	SPBC3H7.10		elongator homolog	tRNA modification
	SPBC4B4.03	rsc1	RSC complex subunit Rsc1	regulation of transcription/ chromatin remodeling
	SPBC4B4.04		translation initiation factor eIF2A	translation
	SPBC4B4.10c	mug77	autophagy associated protein Atg5	autophagy
	SPBC609.02	ptn1	phosphatidylinositol-3,4,5-trisphosphate 3-phosphatase
	SPBC800.03	clr3	histone deacetylase (class II) Clr3	chromatin remodelling
	SPBC902.03		Spo7 homolog	ascospore formation, meiosis
	SPBC947.02	apl2	AP-1 adaptor complex subunit Apl2	transport
	SPCC11E10.06c	SPCC11E10.06c	RNA polymerase II elongator complex subunit Elp4	regulation of transcription
	SPCC11E10.08	rik1	silencing protein Rik1	chromatin remodelling
	SPCC1235.09		histone deacetylase complex subunit	chromatin remodelling
	SPCC1450.02	brf1/bdf1	Swr1 complex bromodomain subunit Brf1	chromatin remodelling
	SPCC1450.08c	wtf16	wtf element Wtf16
	SPCC1795.06	map2	P-factor	response to nitrogen starvation
	SPCC285.09c	cgs2	cAMP-specific phosphodiesterase Cgs2	regulation of transcription, response to nitrogen starvation,...
	SPCC31H12.05c	sds21	serine/threonine protein phosphatase Sds21	rRNA processing
	SPCC338.08	ctp1	sequence orphan	meiosis + DNA double strand break via homologous reparation
	SPCC338.16	pof3	F-box protein Pof3
	SPCC417.09c	SPCC417.09c	transcription factor	regulation of transcription
	SPCC553.08c	SPCC553.08c	GTPase Ria1	translation regulation
	SPCC576.12c	SPCC576.12c	conserved eukaryotic protein	meiosis
	SPCC736.06	SPCC736.06	aspartate-tRNA ligase	mitochondrial translation
	SPCPJ732.01	vps5	retromer complex subunit Vps5	ascospore formation, transport

## Sheet: Feuil2
rpb1 S2A	Gene ID	Gene name	Gene description	Biological category
	SPAC1071.07c	rps1502	40S ribosomal protein S15	translation
	SPAC10F6.16	mug134	endosulphine family protein	mRNA stabilization
	SPAC11E3.01c	swr1	SNF2 family helicase Swr1	chromatin remodelling (histone exchange)
	SPAC11G7.02	pub1	ubiquitin-protein ligase E3	protein ubiquitination
	SPAC11G7.04	ubi1	ribosomal-ubiquitin fusion protein Ubi1	translation
	SPAC139.03		transcription factor	regulation of transcription
	SPAC13G6.09		zf-MYND type	maturation of rRNA
	SPAC13G6.10c		O-glucosyl hydrolase	polysacharids metabolism
	SPAC144.02		transcription factor	chromatin remodelling + regulation of transcription
	SPAC16A10.03c		zinc finger protein Pep5/Vps11	Transport
	SPAC1782.09c	clp1	Cdc14-related protein phosphatase Clp1/Flp1	phosphatase
	SPAC1783.06c	atg12	autophagy associated protein Atg12	autophagy
	SPAC17G8.13c	mst2	histone acetyltransferase Mst2	chromatin remodelling
	SPAC18G6.05c		translation elongation regulator Gcn1	translation
	SPAC19D5.03	cid1	poly(A) polymerase Cid1	mRNA processing
	SPAC1D4.06c	csk1	cyclin-dependent kinase activating kinase Csk1	regulation of cell cycle
	SPAC1F7.01c	spt6	transcription elongation factor Spt6	chromatin remodelling
	SPAC1F8.03c	str3	siderophore-iron transporter Str3	transmembrane transport
	SPAC20G4.02c	fus1	formin Fus1	cytoskeletton organisation
	SPAC20H4.07	rhp57	RecA family ATPase Rhp57	meiotic recombination
	SPAC227.04		autophagy C terminal domain family protein	autophagy
	SPAC22F8.12c	shf1	sequence orphan	chromatin silencing(H2B K ubiquitynalation)
	SPAC22H10.09		sequence orphan
	SPAC23C11.15	pst2	Clr6 histone deacetylase complex subunit Pst2	chromatin remodelling
	SPAC23C4.06c		methyltransferase	methylation
	SPAC23D3.09	arp42	SWI/SNF and RSC complex subunit Arp42	chromatin remodelling+ regulation of transcription
	SPAC23H3.03c		nitrogen permease regulator family	response to amino acid strarvation
	SPAC25A8.02		sequence orphan
	SPAC25B8.18		mitochondrial electron carrier	oxydation-reduction process
	SPAC25H1.03	mug66	meiotically upregulated gene Mug66	ascospore formation, meiosis
	SPAC25H1.05	meu29	sequence orphan
	SPAC26A3.07c	rpl1101	60S ribosomal protein L11	translation
	SPAC27D7.06		electron transfer flavoprotein alpha subunit	electron transport (mitochondrion)
	SPAC2C4.07c		ribonuclease II (RNB) family	RNA catabolic process
	SPAC30.02c		RNA polymerase II elongator complex subunit	regulation of transcription
	SPAC31A2.02	trm112	tRNA (guanine-N2-)-methyltransferase regulatory subunit Trm112	tRNA methylation
	SPAC31G5.09c	spk1	MAP kinase Spk1	regulation of conjugation by signal transduction
	SPAC31G5.19		ATPase with bromodomain protein	chromatin remodelling
	SPAC328.04		AAA family ATPase, unknown biological role	cellular response to stress
	SPAC328.05		RNA-binding protein involved in export of mRNAs	polyadenylation + export of mRNA
	SPAC3C7.03c	rhp55	RecA family ATPase Rhp55	recombinational repair during meiosis
	SPAC3H1.12c	snt2	Lid2 complex subunit Snt2	chromatin remodelling, regulation of transcription
	SPAC3H8.02		sec14 cytosolic factor family	phospholipid transport
	SPAC3H8.05c		conserved fungal protein	replication fork processing, recombinational repair,
	SPAC4A8.10		lipase	lipid metabolism
	SPAC4C5.02c	ryh1	GTPase Ryh1	protein transport
	SPAC4G8.10	gos1	SNARE Gos1	protein transport
	SPAC4G9.13c	vps26	retromer complex subunit Vps26	ascospores formation, vacuolar transport
	SPAC630.14c	tup12	transcriptional corepressor Tup12	chomatin silencing, regulation of transcription
	SPAC631.02	bdf2	Swr1 complex bromodomain subunit Brf2	chromatin remodelling
	SPAC7D4.04	taf1	Taz1 interacting factor 1	autophagy
	SPAC824.02		GPI inositol deacylase
	SPAC824.04		WD repeat protein	mRNA processing (polyadenylation + processing)
	SPAC9G1.07		sequence orphan
	SPAC9G1.11c	spn4	septin Spn4
	SPBC119.12		Golgi matrix protein	protein transport
	SPBC12C2.02c	ste20	sterility protein Ste20	response to nitrogen starvation
	SPBC14F5.03c	kap123	karyopherin Kap123	nucleocytoplasmic + cytoplasmic transport
	SPBC15D4.07c	atg9	autophagy associated protein Atg9	autophagy
	SPBC1604.08c	imp1	importin alpha	cellular response to stress, establishment of nucleus localization, nucleocytoplasmic transport
	SPBC16A3.17c		membrane transporter	transmembrane transport
	SPBC16D10.07c	sir2	Sir2 family histone deacetylase Sir2	chromatin remodelling
	SPBC16D10.08c		heat shock protein Hsp104	response to stress, protein folding (chaperonne)
	SPCC1795.06	map2	P-factor	regulation of conjugation
	SPBC1773.12		transcription factor	regulation of transcription
	SPBC1861.07		elongin C	regulation of transcription
	SPBC18H10.06c	swd2	COMPASS complex subunit Swd2	chromatin remodelling (histone H3-K4 methylation)
	SPBC18H10.19		human UVRAG (UV radiation resistance) homolog	autophagy
	SPBC1921.07c		SAGA complex subunit Sgf29	chromatin remodelling (histone acetylation)
	SPBC19C2.04c	ubp11	ubiquitin C-terminal hydrolase Ubp11	protein deubiquitynation
	SPBC19G7.04		HMG box protein	regulation of transcription from RNA polymerase II promoter
	SPBC1D7.03	mug80	cyclin Clg1	Regulation of CDK (nucleus)
	SPBC1D7.05	byr2	MAP kinase kinase kinase Byr2	regulation of conjugation, MAP kinase
	SPBC21.05c	ral2	Ras guanyl-nucleotide exchange factor Ral2	regulation of conjugation
	SPBC216.05	rad3	ATR checkpoint kinase	DNA replication + repair ; meiotic recombination
	SPBC21B10.13c		transcription factor	regulation of transcription
	SPBC21H7.04		ATP-dependent RNA helicase Dbp7	rRNA processing
	SPBC23G7.08c	rga7	GTPase activating protein Rga7	cytosqueletton organization
	SPBC25H2.15		programmed cell death protein homolog
	SPBC27B12.08		AP-1 accessory protein	endocytosis
	SPBC27B12.11c		transcription factor	regulation of transcription
	SPBC28F2.10c	kap1	chromatin remodeling complex subunit Ngg1	chromatin remodelling
	SPBC29A3.13		PWWP domain protein	chromatin remodelling (H4-K20 methylation)
	SPBC29B5.02c	isp4	OPT oligopeptide transporter family	conjugation, protein transport
	SPBC2F12.03c		EST1 family protein
	SPBC2G2.10c	mug110	sequence orphan
	SPBC30B4.04c	sol1	SWI/SNF complex subunit Sol1	chromatin remodelling
	SPBC31F10.13c	hip1	hira protein Hip1	chromatin remodelling
	SPBC32F12.05c	cwf12	complexed with Cdc5 protein Cwf12	mRNA processing (splicing)
	SPBC32H8.02c	nep2	nedd8 protease Nep2	protein (de)sumoylation (nucleus od cytoplasm)
	SPBC337.11		mitochondrial peptidase	oxydation, reduction
	SPBC36B7.08c		nucleosome assembly protein	chromatin remodelling (histone acetylation)
	SPBC3B8.02	php5	CCAAT-binding factor complex subunit Php5	regulation of transcription
	SPBC3H7.12		sequence orphan
	SPBC4B4.03	rsc1	RSC complex subunit Rsc1	chromatin remodelling
	SPBC4B4.04		translation initiation factor eIF2A	translation
	SPBC4B4.10c	mug77	autophagy associated protein Atg5	autophagy
	SPBC609.02	ptn1	phosphatidylinositol-3,4,5-trisphosphate 3-phosphatase	protein dephosphorylation
	SPBC713.07c		vacuolar polyphosphatase	cellular response to stress
	SPBC725.14	arg6	acetylglutamate synthase Arg6	amino acid byosynthesis
	SPBC800.03	clr3	histone deacetylase (class II) Clr3	chromatin remodelling
	SPBC8D2.17		alpha-1,2-galactosyltransferase	protein galactosylation
	SPBC902.03		Spo7 homolog	ascospore formation, meiosis
	SPBC947.02	apl2	AP-1 adaptor complex subunit Apl2	transport
	SPBP4H10.03	oxa102	mitochondrial inner membrane translocase Oxa102	protein assembly + import (mitochondrion)
	SPCC11E10.06c	elp4	RNA polymerase II elongator complex subunit Elp4	regulation of transcription
	SPCC11E10.08	rik1	silencing protein Rik1	chromatin silencing ( H3K4 H3K9 methylation
	SPCC1235.09		histone deacetylase complex subunit	chromatin remodelling
	SPCC1442.01	ste6	guanyl-nucleotide exchange factor Ste6	conjugation
	SPCC1450.02	brf1/bdf1	Swr1 complex bromodomain subunit Brf1	chromatin remodelling
	SPCC1682.01	qcr9	ubiquinol-cytochrome-c reductase complex subunit 10	transport (mitochondrion)
	SPCC188.07	ccq1	telomere maintenence protein	chromatin silencing at telomere
	SPCC285.09c	cgs2	cAMP-specific phosphodiesterase Cgs2	regulation of transcription, response to nitrogen starvation,...
	SPCC31H12.03c		transcriptional regulator	regulation of transcription
	SPCC338.16	pof3	F-box protein Pof3
	SPCC417.09c		transcription factor	regulation of transcription
	SPCC594.04c		steroid oxidoreductase superfamily protein	steroid metabolism, response to stress
	SPCC794.11c		ENTH domain protein Ent3	transport, endocytosis
	SPCC895.07	alp14	Mad2-dependent spindle checkpoint component	mitosis (microtubule)
	SPCPJ732.01	vps5	retromer complex subunit Vps5	ascospore formation

## Sheet: Feuil3
shared	Gene ID	Gene name	Gene description	Biological category
	SPAC1071.07c	rps1502	40S ribosomal protein S15	translation
	SPAC10F6.16	mug134	endosulphine family protein	mRNA stabilization
	SPAC11E3.01c	swr1	SNF2 family helicase Swr1	chromatin remodelling
	SPAC11G7.02	pub1	ubiquitin-protein ligase E3	protein ubiquitination
	SPAC144.02	iec1	Ino80 complex subunit Iec1	chromatin remodelling
	SPAC16A10.03c		zinc finger protein Pep5/Vps11	Transport
	SPAC1783.06c	atg12	autophagy associated protein Atg12	autophagy
	SPAC17G8.13c	mst2	histone acetyltransferase Mst2	chromatin remodelling
	SPAC19D5.03	cid1	poly(A) polymerase Cid1	mRNA processing
	SPAC1D4.06c	csk1	cyclin-dependent kinase activating kinase Csk1	regulation of cell cycle
	SPAC1F7.01c	spt6	transcription elongation factor Spt6	chromatin remodelling
	SPAC1F8.03c	str3	siderophore-iron transporter Str3	transmembrane transport
	SPAC227.04		autophagy C terminal domain family protein	autophagy
	SPAC22F8.12c	shf1	sequence orphan	chromatin silencing(H2B K ubiquitynalation)
	SPAC23C11.15	pst2	Clr6 histone deacetylase complex subunit Pst2	chromatin remodelling
	SPAC23C4.06c		methyltransferase	methylation
	SPAC23D3.09	arp42	SWI/SNF and RSC complex subunit Arp42	chromatin remodelling+ regulation of transcription
	SPAC25A8.02		sequence orphan
	SPAC25B8.18		mitochondrial electron carrier	oxydation-reduction process
	SPAC25H1.03	mug66	meiotically upregulated gene Mug66	ascospore formation, meiosis
	SPAC31A2.02	trm112	tRNA (guanine-N2-)-methyltransferase regulatory subunit Trm112	tRNA methylation
	SPAC31G5.09c	spk1	MAP kinase Spk1	regulation of conjugation by signal transduction
	SPAC31G5.19		ATPase with bromodomain protein	chromatin remodelling
	SPAC3H1.12c	snt2	Lid2 complex subunit Snt2	chromatin remodelling
	SPAC3H8.02		sec14 cytosolic factor family	phospholipid transport
	SPAC3H8.05c		conserved fungal protein	replication fork processing, recombinational repair,
	SPAC4C5.02c	ryh1	GTPase Ryh1	protein transport
	SPAC4G9.13c	vps26	retromer complex subunit Vps26	ascospores formation, vacuolar transport
	SPAC631.02	bdf2	Swr1 complex bromodomain subunit Brf2	chromatin remodelling
	SPAC7D4.04	taf1	Taz1 interacting factor 1	autophagy
	SPAC824.02		GPI inositol deacylase
	SPAC824.04		WD repeat protein	mRNA processing (polyadenylation + processing)
	SPBC12C2.02c	ste20	sterility protein Ste20	response to nitrogen starvation
	SPBC14F5.03c	kap123	karyopherin Kap123	nucleocytoplasmic + cytoplasmic transport
	SPBC15D4.07c	atg9	autophagy associated protein Atg9	autophagy
	SPBC1604.08c	imp1	importin alpha	cellular response to stress, establishment of nucleus localization, nucleocytoplasmic transport
	SPBC16D10.07c	sir2	Sir2 family histone deacetylase Sir2	chromatin remodelling
	SPBC1711.03		conserved eukaryotic protein	protein folding in RE
	SPBC18H10.06c	swd2	COMPASS complex subunit Swd2	chromatin remodelling (histone H3-K4 methylation)
	SPBC18H10.19		human UVRAG (UV radiation resistance) homolog	autophagy
	SPBC1921.07c	sgf29	SAGA complex subunit Sgf29	chromatin remodelling
	SPBC19G7.04		HMG box protein	regulation of transcription from RNA polymerase II promoter
	SPBC1D7.03	mug80	cyclin Clg1	Regulation of CDK (nucleus)
	SPBC1D7.05	byr2	MAP kinase kinase kinase Byr2	regulation of conjugation, MAP kinase
	SPBC21.05c	ral2	Ras guanyl-nucleotide exchange factor Ral2	regulation of conjugation
	SPBC27B12.11c		transcription factor	regulation of transcription
	SPBC28F2.10c	kap1	chromatin remodeling complex subunit Ngg1	chromatin remodelling
	SPBC30B4.04c	sol1	SWI/SNF complex subunit Sol1	chromatin remodelling
	SPBC31F10.13c	hip1	hira protein Hip1	chromatin remodelling
	SPBC32F12.05c	cwf12	complexed with Cdc5 protein Cwf12	mRNA processing (splicing)
	SPBC4B4.03	rsc1	RSC complex subunit Rsc1	chromatin remodelling
	SPBC4B4.04		translation initiation factor eIF2A	translation
	SPBC4B4.10c	mug77	autophagy associated protein Atg5	autophagy
	SPBC609.02	ptn1	phosphatidylinositol-3,4,5-trisphosphate 3-phosphatase	protein dephosphorylation
	SPBC800.03	clr3	histone deacetylase (class II) Clr3	chromatin remodelling
	SPBC902.03		Spo7 homolog	ascospore formation, meiosis
	SPBC947.02	apl2	AP-1 adaptor complex subunit Apl2	transport
	SPCC11E10.06c	elp4	RNA polymerase II elongator complex subunit Elp4	regulation of transcription
	SPCC11E10.08	rik1	silencing protein Rik1	chromatin remodelling
	SPCC1235.09		histone deacetylase complex subunit	chromatin remodelling
	SPCC1450.02	brf1/bdf1	Swr1 complex bromodomain subunit Brf1	chromatin remodelling
	SPCC1795.06	map2	P-factor	response to nitrogen starvation
	SPCC285.09c	cgs2	cAMP-specific phosphodiesterase Cgs2	regulation of transcription, response to nitrogen starvation,...
	SPCC338.16	pof3	F-box protein Pof3
	SPCC417.09c		transcription factor	regulation of transcription
	SPCPJ732.01	vps5	retromer complex subunit Vps5	ascospore formation
