# Supplementary material for: Promoter nucleosome dynamics regulated by signalling through the CTD code
Source: eLife. 2015 Jun 22;4:e09008. doi: 10.7554/eLife.09008 (PMC4502402; doi:10.7554/eLife.09008)
Supplement: Figure 1—source data 2. — List of the genes showing dynamic changes in the −1 nucleosome (TSS) with false discovery rate < 0.5% and list of the 10% genes showing the strongest promoter NDR size decrease in the S2A mutant (see Figure 1A). DOI: http://dx.doi.org/10.7554/eLife.09008.005 [file elife09008s002.xlsx]

## Sheet: general
General features of the dynamic nucleosomes in the CTD S2A mutant
% of dynamic nucleosomes (FDR< 0.5%) by chromosome
Chromosome	% of dynamic nucleosomes
I	3.61
II	3.94
III	3.71
I+II+III	3.76
sub-types of dynamic nucleosomes (FDR < 0.05)
Fuzziness change	0
Occupancy change	545
Position shift	439
Occupancy and fuzziness	25
Average promoter NDR length
average promoter NDR length for all genes : 106.37 bp
average promoter NDR length for all genes with dynamic -1 nucleosome :157.40 bp
average promoter NDR length for all genes with dynamic promoter : 165.42 bp
average promoter NDR length for the 10% genes whose promoter NDR shrinks the most in the S2A : 136.28 bp
Average 5'-UTR length
average 5'-UTR length for all genes : 292.5952 bp
average 5'- UTR length for genes with dynamic -1 nucleosome : 243.37 bp
average 5'- UTR length for genes with dynamic promoter : 307.37 bp
average 5'- UTR length for the 10% genes whose promoter NDR shrinks the most in the S2A : 358.48 bp

## Sheet: dyna -1 list
Genes showing dynamic changes (FDR < 0.5%) at the -1 nucleosome (TSS) in the CTD S2A mutant
SPCC1235.09
SPCC794.03
SPCC306.06c
SPCC4G3.03
SPCC10H11.01
SPCC962.01
SPCP31B10.08c
SPCC1183.11
SPCC1020.12c
SPCC1020.08
SPCC1393.02c
SPCC63.04
SPCC1742.01
SPCC338.15
SPCC338.05c
SPCC1753.04
SPCC777.05
SPCC663.15c
SPCC417.02
SPCC191.05c
SPCC1223.02
SPCC576.07
SPCC126.14
SPCC1919.05
SPCC965.10
SPBC1348.03
SPBC1271.03c
SPBC1271.05c
SPBC428.16c
SPBC649.02
SPBC1706.03
SPBC947.12
SPBC119.12
SPBC577.08c
SPBC577.14c
SPBC32C12.02
SPBC646.09c
SPBC646.15c
SPBC646.17c
SPBC146.11c
SPBC146.12
SPBC1709.01
SPBC1709.02c
SPBC409.05
SPBC409.13
SPBC725.12
SPBC651.01c
SPBC31A8.01c
SPBC17A3.09c
SPBC17A3.10
SPBP22H7.09c
SPBC19C2.11c
SPBC28E12.01c
SPBC28E12.02
SPBP16F5.02
SPBC16E9.01c
SPBP16F5.08c
SPBC17G9.02c
SPBC16H5.12c
SPBC19G7.16
SPBC36B7.04
SPBC21D10.08c
SPBC365.02c
SPBC365.11
SPBC6B1.03c
SPBC32F12.07c
SPBC32F12.09
SPBP19A11.02c
SPBP19A11.06
SPBC1703.07
SPBC2A9.06c
SPBC2D10.13
SPBC20F10.08c
SPBC20F10.09
SPBC17D1.02
SPBC11C11.11c
SPBC2G2.13c
SPBC1718.04
SPBPB7E8.02
SPBC1105.10
SPBC887.15c
SPBC887.16
SPBP8B7.10c
SPBC25D12.03c
SPBC21C3.13
SPBC1604.05
SPBC3B9.10
SPBC14F5.01
SPBC1652.02
SPBC16A3.15c
SPAC212.12
SPAC1F8.02c
SPAC1F8.08
SPAC13G6.09
SPAC13G6.14
SPAC806.11
SPAC1F5.04c
SPAC18B11.10
SPAC12G12.05c
SPAC12G12.06c
SPAC630.10
SPAC630.15
SPAC1751.02c
SPAC1751.03
SPAC31A2.06
SPAC31A2.07c
SPAC31A2.08
SPAC13C5.01c
SPAC13C5.06c
SPAC23E2.01
SPAC24H6.10c
SPAC24H6.06
SPAC24H6.01c
SPAC1F3.02c
SPAC1F3.04c
SPAC1D4.04
SPAC22F3.13
SPAC22F3.08c
SPAC1296.05c
SPAC22G7.05
SPAC22G7.06c
SPAC521.05
SPAC23G3.01
SPAC1687.11
SPAC1687.16c
SPAC222.07c
SPAC222.09
SPAC222.12c
SPAC222.16c
SPAC821.08c
SPAC821.13c
SPAC23C4.14
SPAC23C4.18c
SPAC1A6.10
SPAC30D11.11
SPAC30D11.13
SPAC30D11.14c
SPAC30D11.07
SPAC56F8.07
SPAC56F8.08
SPAC56F8.10
SPAC10F6.02c
SPAPB17E12.05
SPAPB17E12.14c
SPAC6F12.16c
SPAC6F12.17
SPAC57A10.09c
SPAC20G8.05c
SPAC20G8.06
SPAC3A12.14
SPAC3A12.16c
SPAC9.05
SPAC57A7.08
SPAC1705.03c
SPAP27G11.12
SPAP27G11.13c
SPAC343.12
SPAC664.03
SPAC824.09c
SPAC664.04c
SPAC1002.07c
SPAC1002.16c
SPAC1399.06
SPAPB1A10.10c
SPAC140.02
SPAPB1A10.14
SPAC110.05
SPAC9G1.03c
SPAC9G1.04
SPAC9G1.06c
SPAC9G1.10c
SPAC9G1.12
SPAC17H9.04c
SPAC17H9.16
SPAC607.06c
SPAC20H4.09
SPAC20H4.11c
SPAC23C11.01
SPAC23C11.02c
SPAC23C11.03
SPAC1783.07c
SPAC18G6.03
SPAC13D6.02c
SPAC4G9.03
SPAC4G9.06c
SPAC4G9.07
SPAC4G9.16c
SPAC4G9.22
SPAC6C3.07
SPAC17G8.11c
SPAC22H10.11c
SPAC6B12.11
SPAC23H3.03c
SPAC25H1.08c
SPAC25H1.09
SPAC25H1.10c
SPAC4A8.06c
SPAC823.14
SPAC4F8.06
SPAC4F8.01
SPAC1805.07c
SPAC1805.11c
SPAC1805.15c
SPAC1B2.04
SPAC3F10.03
SPAC8F11.10c
SPACUNK4.19
SPACUNK4.11c
SPAC513.04
SPAPB24D3.10c
SPAC31G5.05c
SPAC31G5.16c
SPAC1786.01c
SPAC1786.02
SPAC3G9.15c
SPAC3G9.05
SPAC1486.01
SPAC6G10.08
SPAC6G10.12c
SPAC6G9.07c
SPAPB1E7.04c
SPAPB1E7.05
SPAPB1E7.07
SPAPB1E7.08c
SPAPB1E7.09
SPAPB1E7.10
SPAPB1E7.11c
SPAPB1E7.12
SPAC26A3.05
SPAC17A2.04c
SPAC17A2.10c
SPAC17G6.05c
SPAC17G6.06
SPAC1142.05
SPAC8C9.04
SPAC15E1.03
SPAP4C9.02
SPAC1F12.06c
SPAC4H3.14c
SPAC1071.04c
SPAC1071.08
SPAC1071.13
SPAC926.08c
SPAC926.09c
SPAC323.07c
SPAC2F3.17c
SPAPB15E9.01c
SPAC27E2.02
SPAC23A1.03
SPAC23A1.11
SPAC26H5.11
SPAC25B8.12c
SPAC25B8.14
SPAC683.03
SPAC694.03
SPAC694.05c
SPAC1F7.01c
SPAC1F7.02c
SPAC1F7.03
SPAC1F7.06
SPAC1F7.10
SPAC21E11.06
SPAC21E11.07
SPAC21E11.08
SPAC2C4.07c
SPAC2C4.11c
SPAC25G10.06
SPAC27F1.04c
SPAC27F1.05c
SPAC23D3.02
SPAC27F1.09c
SPAC23D3.08
SPAC23D3.10c
SPAC23D3.11
SPAC29E6.01
SPAC16.02c
SPAC16.04
SPAC9E9.03
SPAC9E9.06c
SPAC9E9.13
SPAC9E9.15
SPAC17C9.11c
SPAC1851.03
SPAC1851.04c
SPAC27D7.02c
SPAC637.10c
SPAC637.11
SPAC12B10.03
SPAC1093.01
SPAC30C2.05
SPAC144.06
SPAC144.15c
SPAC1782.11
SPAC20G4.05c
SPAC4F10.10c
SPAC4F10.12
SPAC19B12.01
SPAPB8E5.06c
SPAC1B3.07c
SPAC1B3.08
SPAC1B3.21
SPAC22E12.13c
SPAC1006.04c
SPAC1006.08
SPAC1250.05
SPAC29A4.17c
SPAC29A4.13
SPAC26F1.13c
SPAC26F1.11
SPAC26F1.05
SPAC26F1.06
SPAPJ691.03
SPAC14C4.07
SPAC14C4.14
SPAC11E3.15
SPAP8A3.05
SPAP8A3.06
SPAC4D7.05
SPAC3G6.06c
SPAC3G6.07
SPAC29B12.04
SPAC29B12.10c
SPAC1039.02
SPAC186.06

## Sheet: top10 list
List of the genes showing the strongest promoter NDR size decrease the CTD S2A mutant (see Figure 1A)
SPCC1884.01
SPCP20C8.02c
SPCC757.11c
SPCC330.21
SPCC330.08
SPCC320.14
SPCC320.05
SPCC1235.05c
SPCC794.01c
SPCC553.10
SPCC736.07c
SPCC594.02c
SPCC594.03
SPCC594.06c
SPCC1682.07
SPCC364.02c
SPCP31B10.05
SPCC962.06c
SPCC1672.14
SPCC16C4.22
SPCC18B5.10c
SPCC1020.12c
SPCC1020.03
SPCC1393.08
SPCC63.03
SPCC16A11.06c
SPCC16A11.09c
SPCC24B10.04
SPCC24B10.07
SPCC24B10.14c
SPCC1795.09
SPCC1259.09c
SPCC1259.10
SPCC1259.13
SPCC4B3.13
SPCC4B3.09c
SPCC550.04c
SPCC550.10
SPCC550.11
SPCC4E9.01c
SPCC4E9.02
SPCC645.06c
SPCC645.09
SPCC645.12c
SPCC23B6.03c
SPCC1322.01
SPCC1281.02c
SPCC1281.07c
SPCC622.08c
SPCC622.09
SPCC11E10.04
SPCC188.03
SPCC188.13c
SPCC584.15c
SPCC162.12
SPCC162.07
SPCC13B11.04c
SPCC777.02
SPCC777.13
SPCC777.17c
SPCC417.10
SPCC417.11c
SPCC191.04c
SPCC1442.08c
SPCC1442.10c
SPCC1442.19
SPCC1223.03c
SPCC1223.15c
SPCC1223.10c
SPCC297.06c
SPCC737.06c
SPCC18.10
SPCC1906.01
SPCC4F11.05
SPCC1739.13
SPCC576.14
SPCC576.17c
SPCC1620.04c
SPCC1620.12c
SPCC830.06
SPCC830.07c
SPCC1919.15
SPCC1840.08c
SPCC1840.11
SPCC965.11c
SPCC1494.11c
SPBC1348.08c
SPBPB8B6.03
SPBPB8B6.05c
SPBPB21E7.04c
SPBPB10D8.01
SPBC1683.02
SPBC1198.10c
SPBC800.03
SPBC1271.08c
SPBC106.10
SPBC106.11c
SPBC582.05c
SPBC428.02c
SPBC428.15
SPBC428.16c
SPBC354.08c
SPBC839.07
SPBC839.15c
SPBC115.01c
SPBC947.11c
SPBC947.08c
SPBC947.06c
SPBC947.07
SPBC119.02
SPBC119.05c
SPBC36.02c
SPBC36.13
SPBC713.05
SPBC646.13
SPBC646.14c
SPBC646.15c
SPBP35G2.05c
SPBC146.06c
SPBC146.09c
SPBC146.14c
SPBC337.16
SPBC1734.05c
SPBC1734.13
SPBC1709.03
SPBC1709.06
SPBC1709.11c
SPBC1709.14
SPBC409.13
SPBC1306.01c
SPBC1306.02
SPBC4.02c
SPBC725.07
SPBC725.14
SPBC651.01c
SPBC3D6.02
SPBC30B4.05
SPBC27B12.08
SPBP22H7.05c
SPBC32H8.03
SPBC11B10.09
SPBC1215.01
SPBC27.06c
SPBC28F2.06c
SPBC28F2.11
SPBC21B10.13c
SPBC21B10.03c
SPBC2F12.15c
SPBC9B6.09c
SPBC28E12.03
SPBC9B6.10
SPBC28E12.06c
SPBC3H7.06c
SPBP16F5.02
SPBC16E9.03c
SPBC16E9.09c
SPBC16E9.10c
SPBC1E8.04
SPBC1A4.06c
SPBC1A4.07c
SPBP23A10.11c
SPBC23G7.16
SPBC23G7.17c
SPBC23G7.14
SPBC1711.01c
SPBC1711.04
SPBC1711.06
SPBC1711.12
SPBC1815.01
SPBC15C4.04c
SPBC16H5.06
SPBC16H5.07c
SPBC12D12.08c
SPBC24C6.02
SPBC24C6.03
SPBC24C6.07
SPBC19G7.10c
SPBC19G7.19
SPBC36B7.07
SPBC21D10.06c
SPBC12C2.11
SPBC12C2.07c
SPBC12C2.02c
SPBC557.03c
SPBC365.20c
SPBC365.02c
SPBC365.14c
SPBC29A10.06c
SPBC2G5.01
SPBC2G5.05
SPBC2G5.06c
SPBC3E7.09
SPBC18A7.01
SPBC4F6.16c
SPBC32F12.07c
SPBC32F12.11
SPBC32F12.17
SPBC19C7.01
SPBP19A11.02c
SPBP4H10.20
SPBC2A9.10
SPBC2D10.06
SPBC2D10.14c
SPBC15D4.04
SPBC1778.02
SPBC4C3.09
SPBC4C3.03
SPBC405.04c
SPBC405.05
SPBC776.12c
SPBC776.16
SPBC21.02
SPBC21.06c
SPBC19F8.05
SPBC25H2.13c
SPBC25H2.09
SPBC20F10.02c
SPBC20F10.08c
SPBC20F10.09
SPBC17D1.04
SPBC17D1.05
SPBC11C11.03
SPBC2G2.11
SPBC1718.02
SPBC1105.05
SPBC1105.10
SPBC887.04c
SPBC887.08
SPBC887.09c
SPBP8B7.15c
SPBP8B7.16c
SPBP8B7.19
SPBC19F5.03
SPBC25D12.03c
SPBC13G1.14c
SPBC13G1.13
SPBC31F10.09c
SPBC31F10.15c
SPBC21C3.14c
SPBC23E6.04c
SPBC1604.18c
SPBC1604.14c
SPBC1604.15
SPBC26H8.01
SPBC26H8.03
SPBC26H8.06
SPBC26H8.11c
SPBC32C12.02
SPBC3B9.14c
SPBC3B9.17
SPBC215.07c
SPBC1347.11
SPBC1861.03
SPBC14F5.10c
SPBC1652.01
SPBC1652.02
SPBC16A3.12c
SPBC16A3.07c
SPBC1539.04
SPBC1539.07c
SPBC1289.04c
SPBC1289.17
SPBC1289.15
SPBC8E4.03
SPBC8E4.02c
SPBP4G3.02
SPBPB2B2.01
SPBPB2B2.12c
SPAC977.06
SPAC977.07c
SPAC1F8.07c
SPAC1F8.08
SPAC11D3.05
SPAC11D3.15
SPAC5H10.11
SPAC13G6.05c
SPAC13G6.09
SPAC13G6.10c
SPAC24B11.05
SPAC806.11
SPAC18B11.09c
SPAC12G12.14c
SPAC18B11.02c
SPAC12G12.12
SPAC12G12.02
SPAC630.05
SPAC630.09c
SPAC630.10
SPAC630.12
SPAC1751.04
SPAC31A2.02
SPAC31A2.04c
SPAC31A2.05c
SPAC31A2.13c
SPAC24H6.08
SPAC227.01c
SPAC227.02c
SPAC227.07c
SPAC227.17c
SPAC3H8.04
SPAC3H8.08c
SPAC1F3.06c
SPAC1D4.11c
SPAC1296.04
SPAC1296.05c
SPAC1296.06
SPAC22G7.06c
SPAC521.04c
SPAC1687.23c
SPAC1687.17c
SPAC1687.22c
SPAC222.09
SPAC821.04c
SPAC821.05
SPAC139.03
SPAC139.06
SPAC23C4.02
SPAC23C4.07
SPAC1A6.02
SPAC1A6.10
SPAC30D11.06c
SPAC30D11.02c
SPAC22A12.03c
SPAC22A12.08c
SPAC22A12.10
SPAC22A12.11
SPAC10F6.11c
SPAC56E4.03
SPAC1420.03
SPAC1420.04c
SPAPB17E12.04c
SPAC6F12.12
SPAC57A10.07
SPAC57A10.11c
SPAC20G8.04c
SPAC20G8.08c
SPAC3A12.09c
SPAC9.08c
SPAC9.09
SPAC5D6.01
SPAC167.02
SPAC23H4.17c
SPAP27G11.15
SPAC343.08c
SPAC343.17c
SPAC343.18
SPAC824.02
SPAC824.05
SPACUNK12.02c
SPAC17A5.18c
SPAC1610.02c
SPAC1610.04
SPAC1002.13c
SPAC1002.16c
SPAC1002.17c
SPAP11E10.01
SPAP14E8.02
SPAC3H1.10
SPAC9G1.10c
SPAC17H9.02
SPAC607.04
SPAC732.02c
SPAC3C7.09
SPAC20H4.05c
SPAC20H4.06c
SPAC20H4.07
SPAC13F5.06c
SPAC18G6.02c
SPAC13D6.04c
SPAC4G9.20c
SPAC13G7.01c
SPAC6C3.06c
SPAC15F9.01c
SPAC1B9.03c
SPAC6B12.18
SPAC6B12.08
SPAC6B12.14c
SPAC32A11.01
SPAC32A11.04c
SPAC19A8.09
SPAC19A8.03
SPAC23H3.06
SPAC23H3.11c
SPAC23H3.12c
SPAC7D4.12c
SPAC7D4.10
SPAC7D4.02c
SPAC4F8.05c
SPAC644.12
SPAPB2B4.03
SPAPB2B4.07
SPAC6F6.08c
SPAC1805.08
SPAC1B2.05
SPAC8F11.04
SPAC8F11.10c
SPAC513.03
SPAC2E1P3.03c
SPAC31G5.09c
SPAC31G5.15
SPAC24C9.04
SPAC24C9.15c
SPAC16A10.08c
SPAC688.04c
SPAC688.16
SPAC3G9.12
SPAC3G9.09c
SPAC3G9.04
SPAC3G9.06
SPAC3G9.01
SPAPB1E7.14
SPAC26A3.01
SPAC26A3.12c
SPAC26A3.13c
SPAC26A3.15c
SPAC26A3.16
SPAC8E11.02c
SPAC8E11.04c
SPAC959.05c
SPAP32A8.02
SPAC3H5.07
SPAC3H5.06c
SPAC3A11.02
SPAC3A11.03
SPAC3A11.04
SPAC328.06
SPAC16E8.02
SPAC16E8.09
SPAC16E8.15
SPAC17G6.16c
SPAC8C9.05
SPAC8C9.11
SPAC15E1.05c
SPAC1556.01c
SPAC1556.07
SPAC4H3.10c
SPAC1071.04c
SPAC1071.10c
SPAC926.03
SPAC926.06c
SPAC323.01c
SPAC323.08
SPAPB15E9.01c
SPAPB15E9.03c
SPAC27E2.03c
SPAC27E2.11c
SPAC27E2.04c
SPAC27E2.08
SPAC27E2.09
SPAC23A1.15c
SPAC26H5.02c
SPAC1F7.03
SPAC1F7.09c
SPAC1F7.10
SPAC2C4.09
SPAC2C4.14c
SPAC2C4.15c
SPAC27F1.06c
SPAC23D3.13c
SPAC1527.03
SPAC29E6.09
SPAC17C9.05c
SPAC27D7.14c
SPAC637.03
SPAC1834.04
SPAC1834.10c
SPAC17D4.02
SPAC458.04c
SPAPYUG7.03c
SPAC1782.01
SPAC11H11.03c
SPAC20G4.02c
SPAC20G4.04c
SPAC20G4.06c
SPAC20G4.09
SPAC4F10.06
SPAC4F10.11
SPAC4F10.16c
SPAC19B12.07c
SPAC19B12.13
SPAC1B3.21
SPAC1B3.16c
SPAC1952.16
SPAC22E12.02
SPAC22E12.07
SPAC22E12.19
SPAC1006.05c
SPAC1006.06
SPAC29A4.06c
SPAC29A4.07
SPAC26F1.11
SPAC26F1.04c
SPAC19D5.09c
SPAC19D5.11c
SPAC2H10.04
SPAC11E3.08c
SPAC11E3.10
SPAC11E3.11c
SPAC11E3.12
SPAC11E3.14
SPAP8A3.02c
SPAP8A3.05
SPAC4D7.06c
SPAC3G6.08
SPAC29B12.02c
SPAC29B12.10c
SPAC1039.04
SPAC1039.10
SPAC869.02c
SPAC186.07c
SPAC750.02c
