# Supplementary figures and images for: Promoter nucleosome dynamics regulated by signalling through the CTD code
Source: eLife journal article supplement (doi:10.7554/elife.09008), 2015-06-20

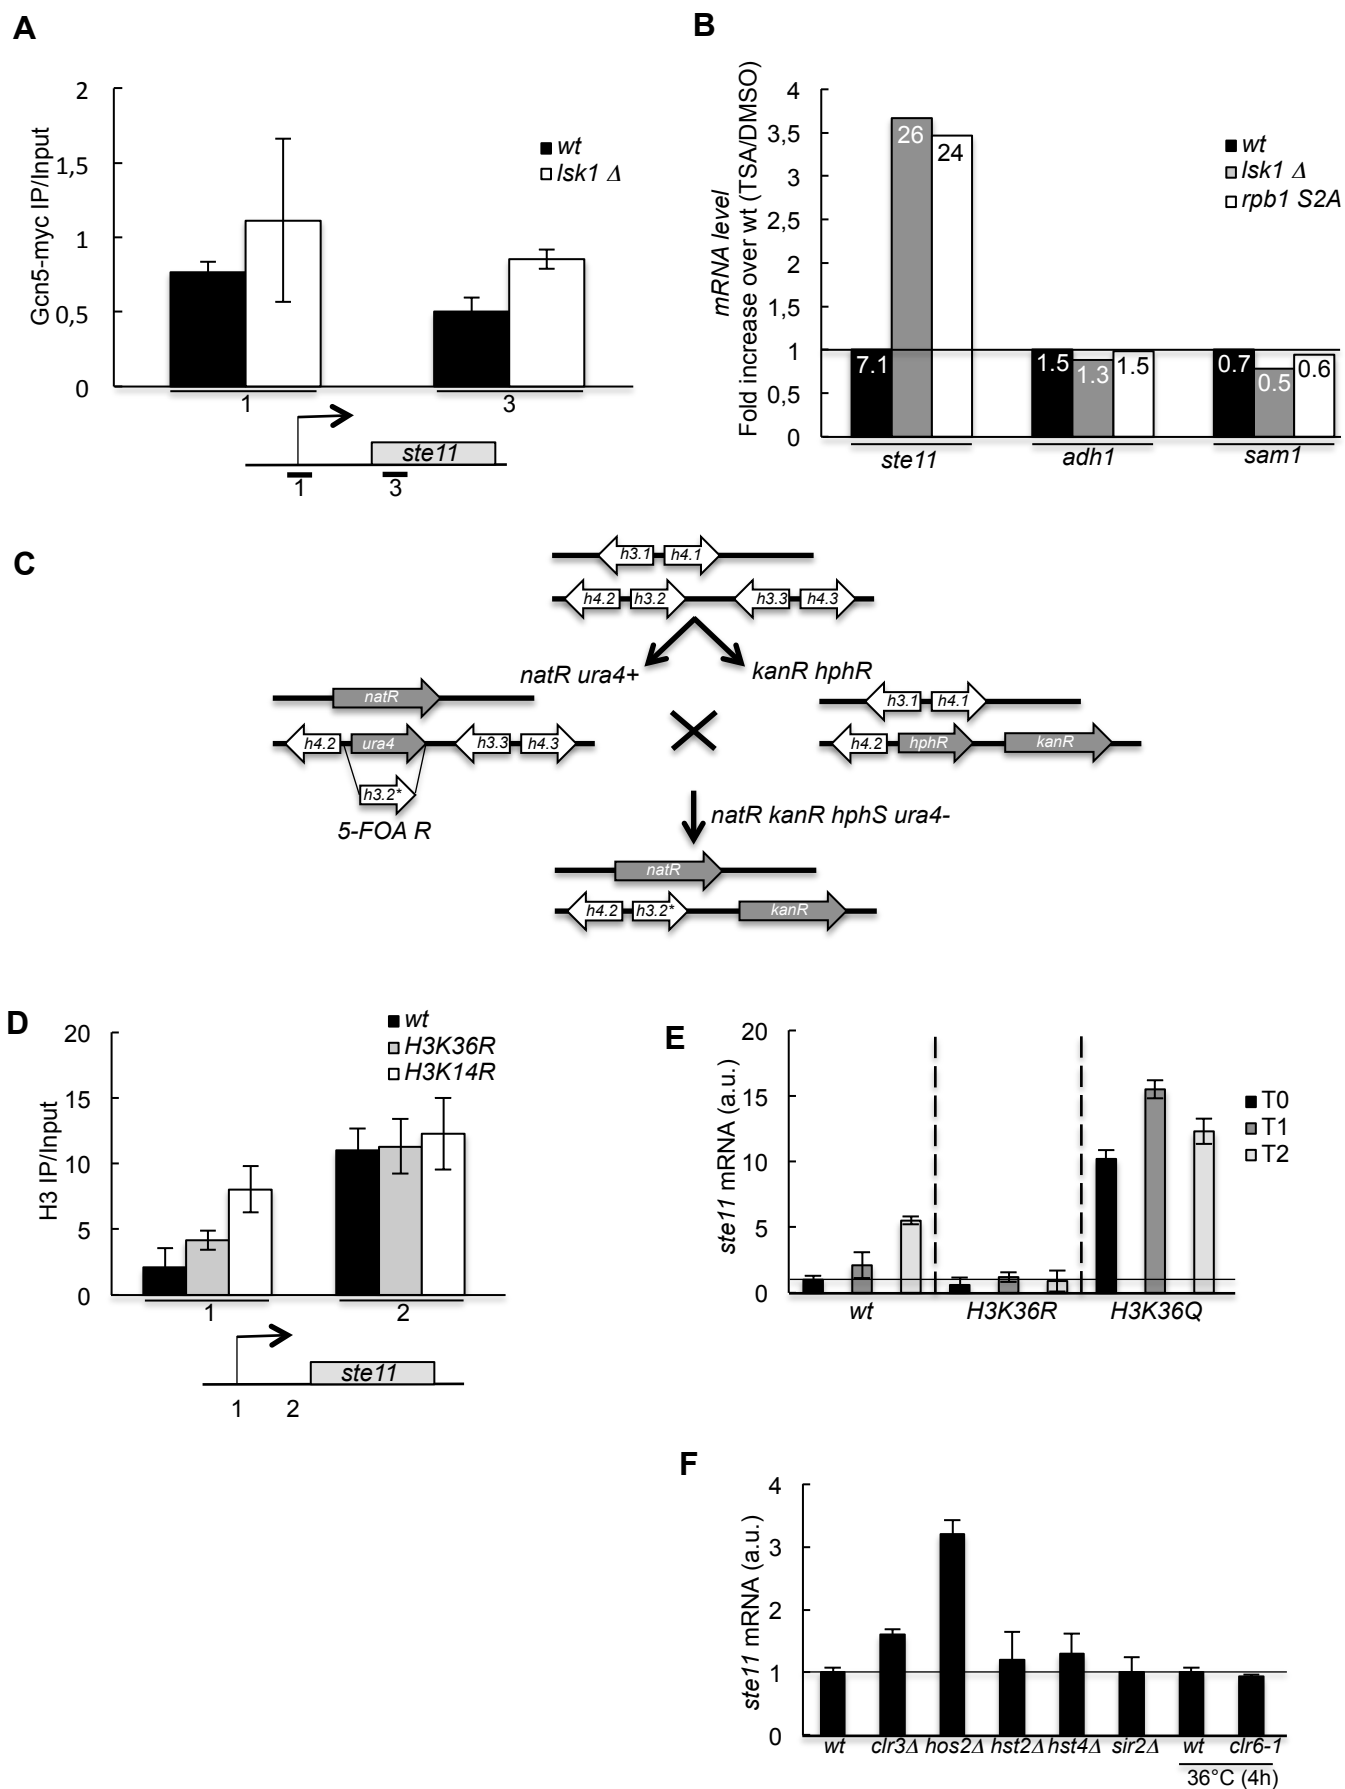

Figure 3 – Figure Supplement 1

Supplement: supp [file elife-09008-supp-v1.zip]

**A**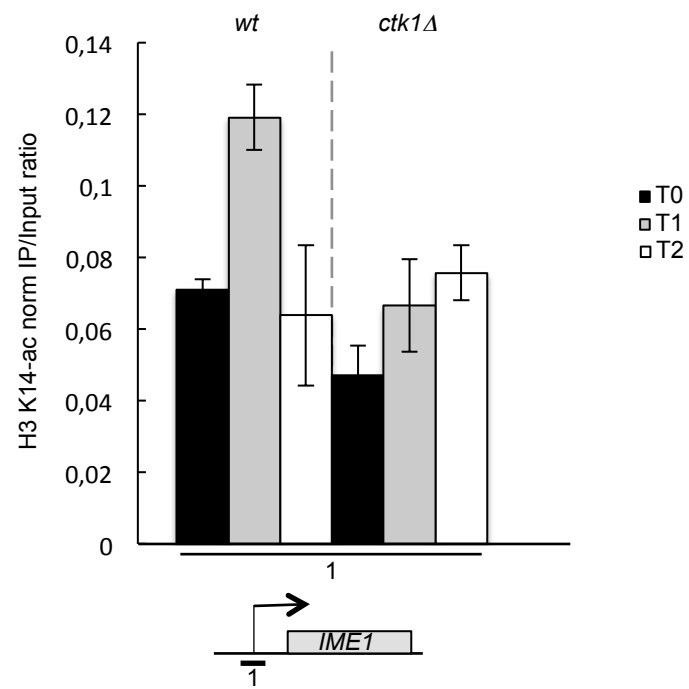**B**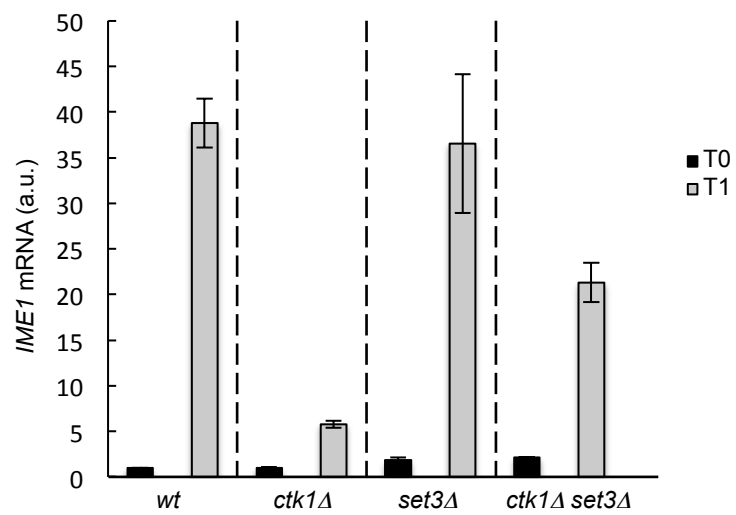

**Figure 8 – Figure Supplement 1**

Supplement: supp [file elife-09008-supp-v1.zip]

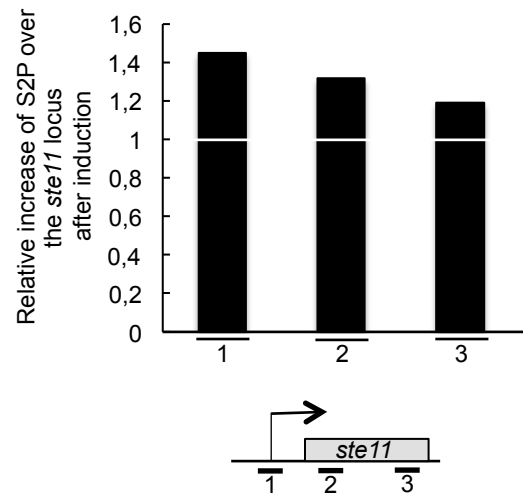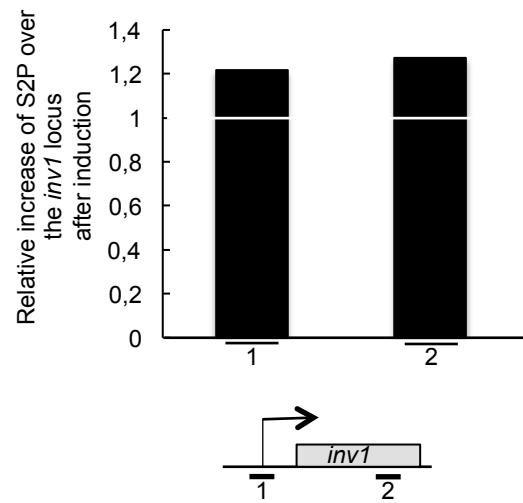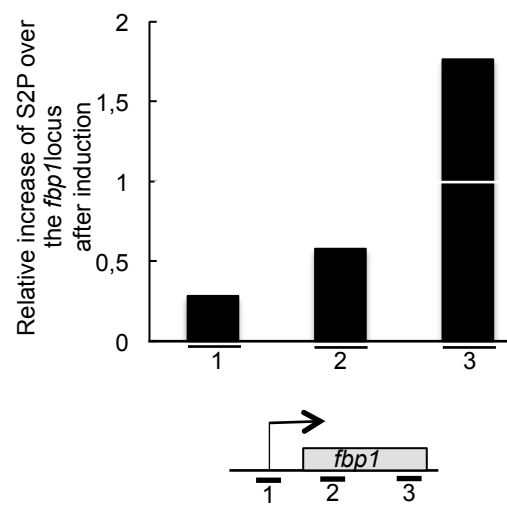

Figure 7 – Figure Supplement 1

Supplement: supp [file elife-09008-supp-v1.zip]

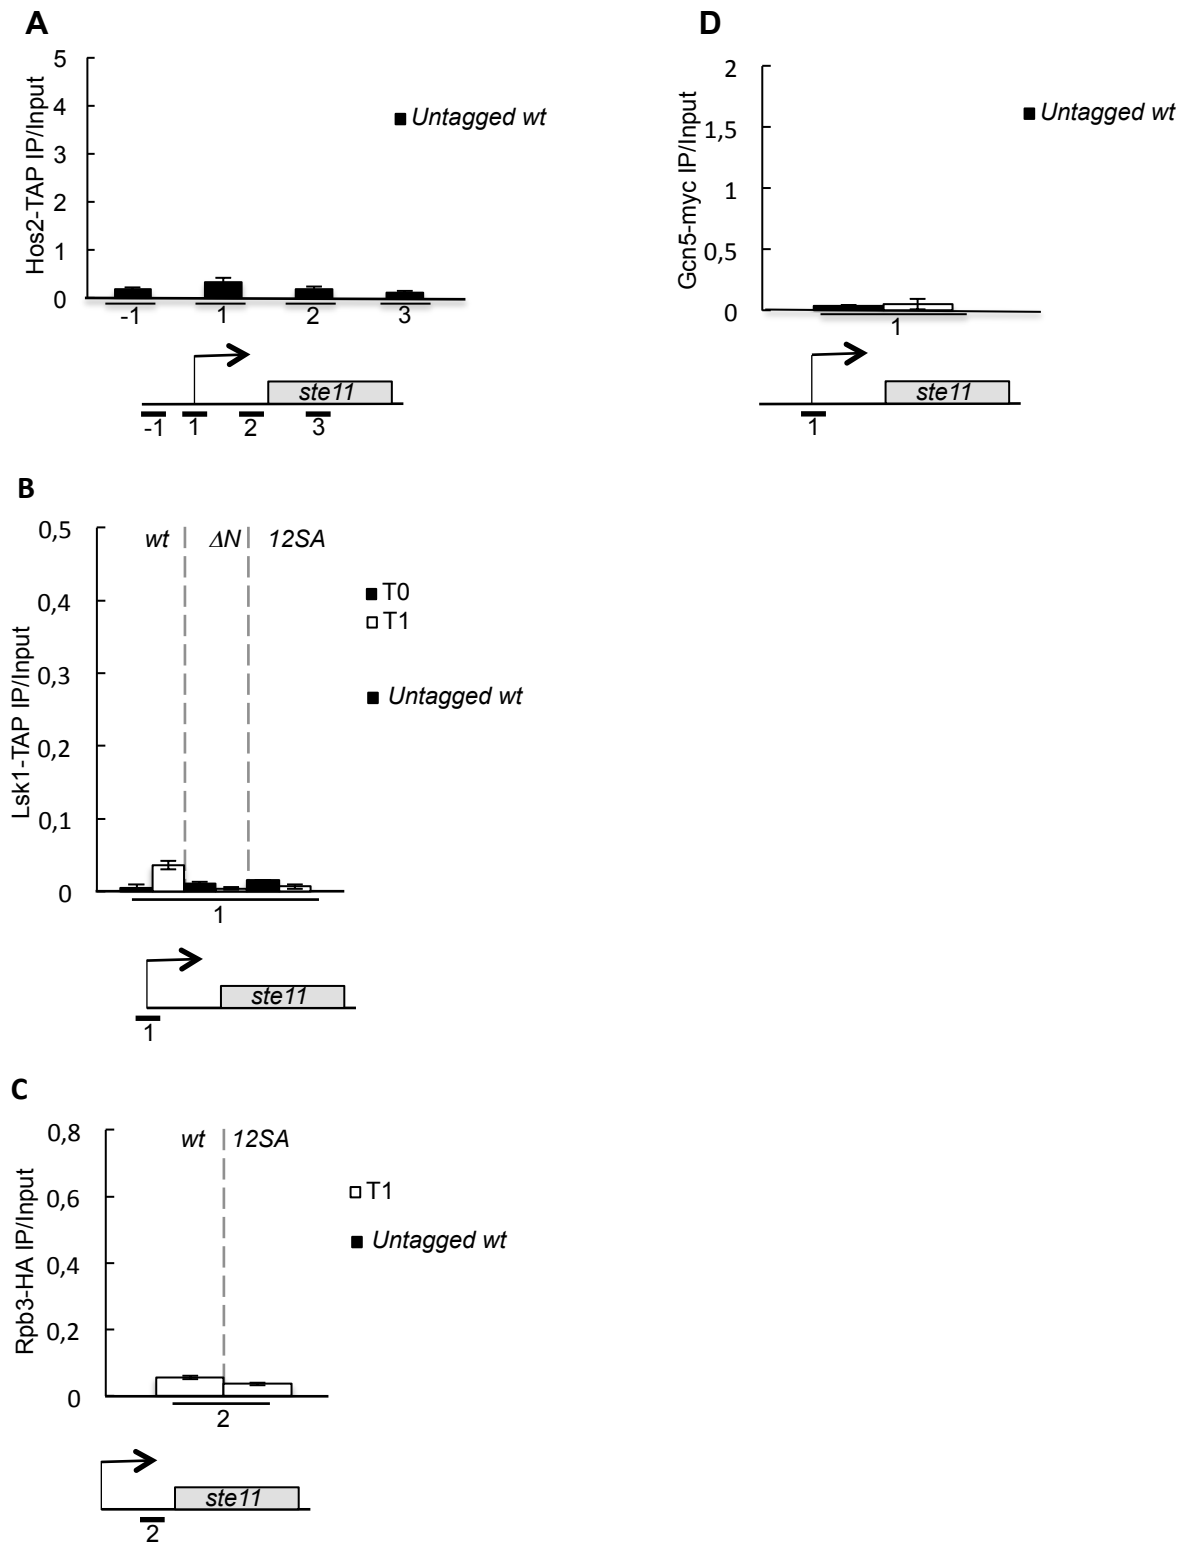

**Figure 3 - Figure Supplement 2**

Supplement: supp [file elife-09008-supp-v1.zip]

**A**

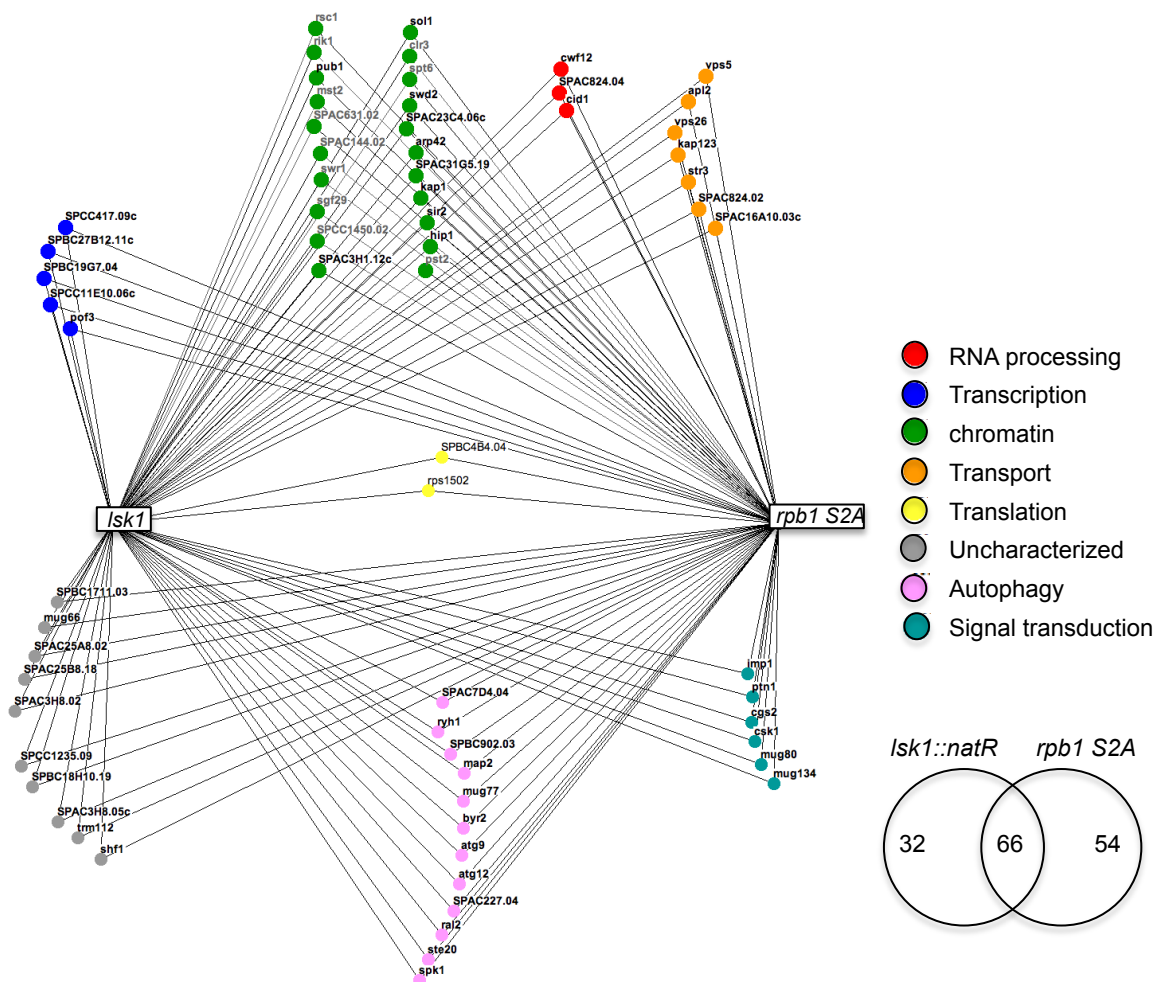

**B**

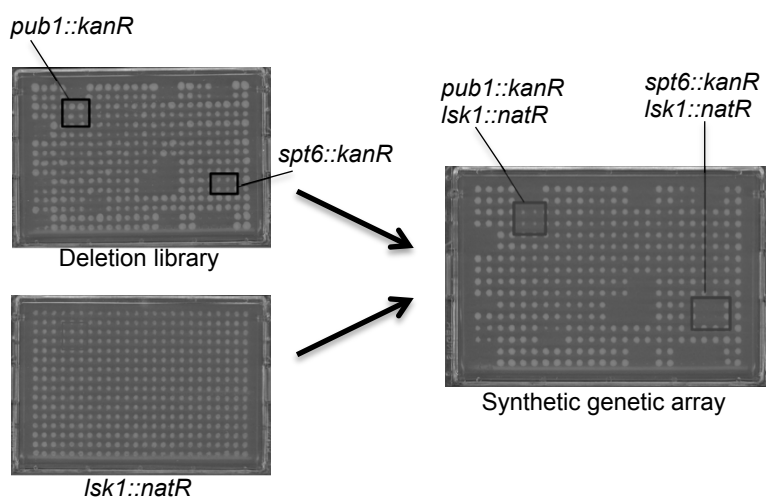

**C**

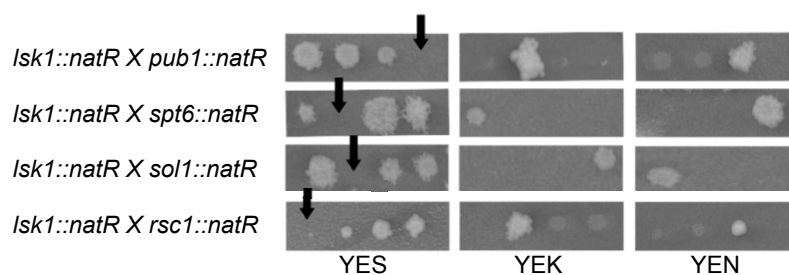

**Figure 1- Figure Supplement 1**

Supplement: supp [file elife-09008-supp-v1.zip]

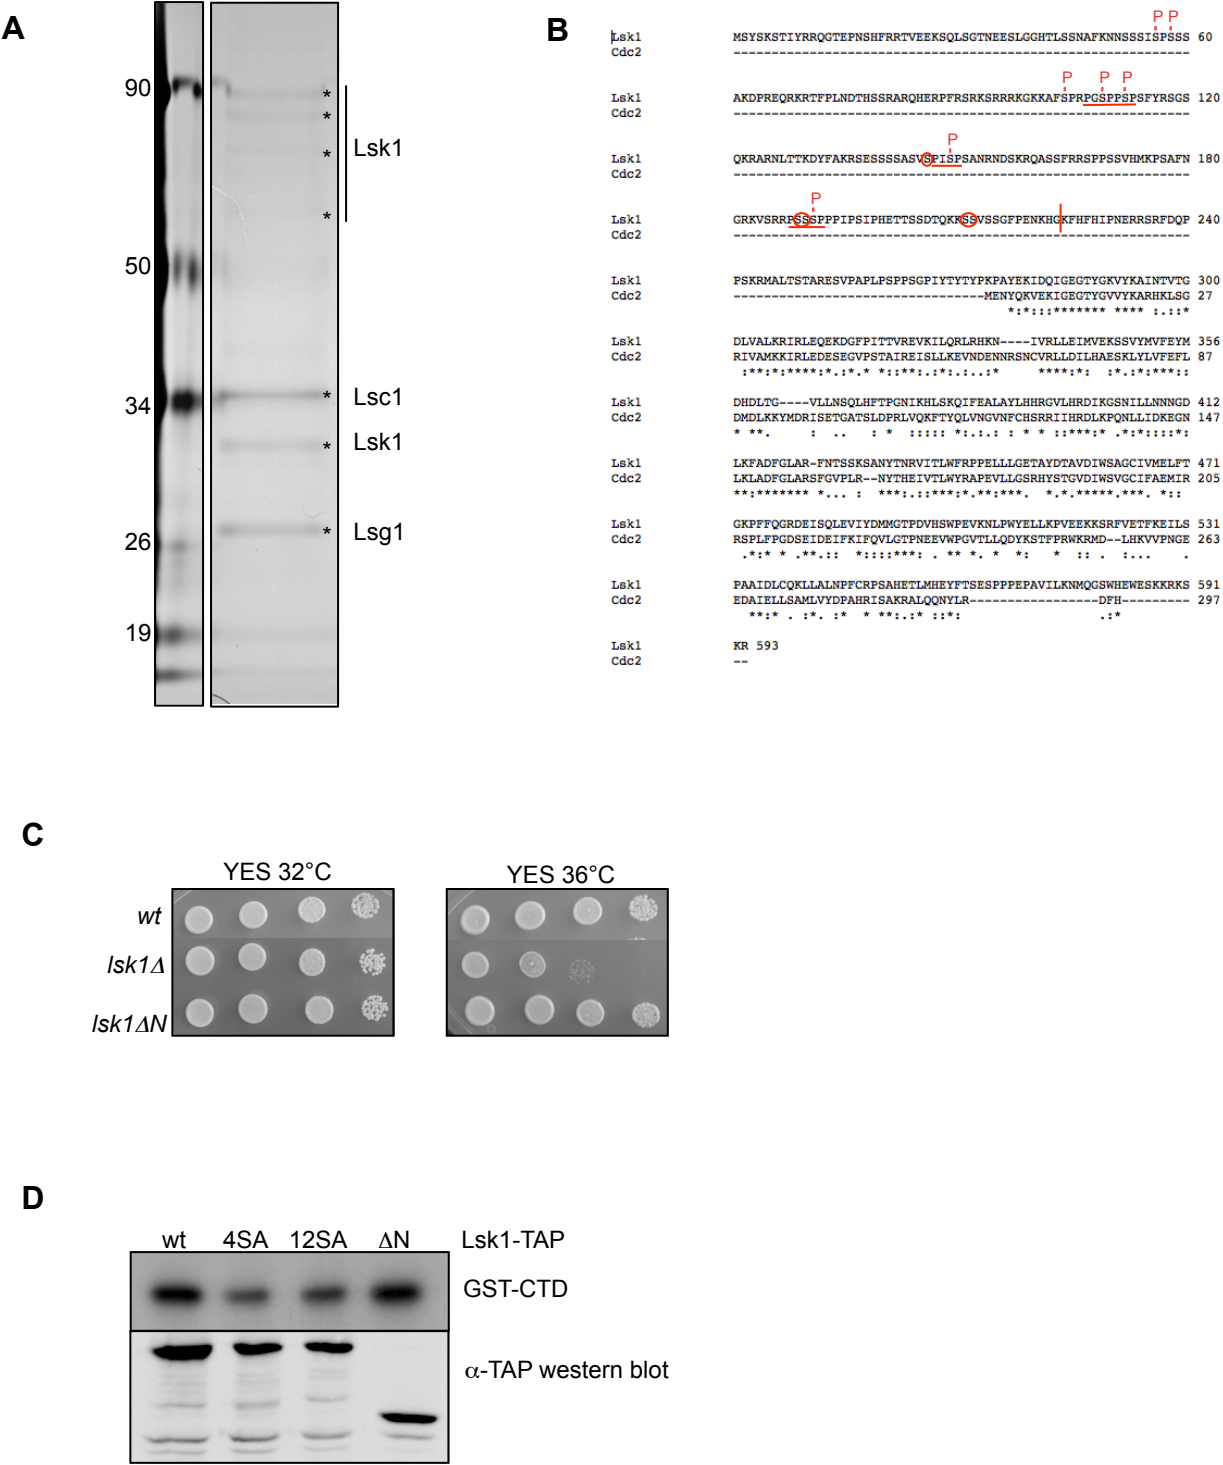

Figure5 – Figure Supplement 1

Supplement: supp [file elife-09008-supp-v1.zip]

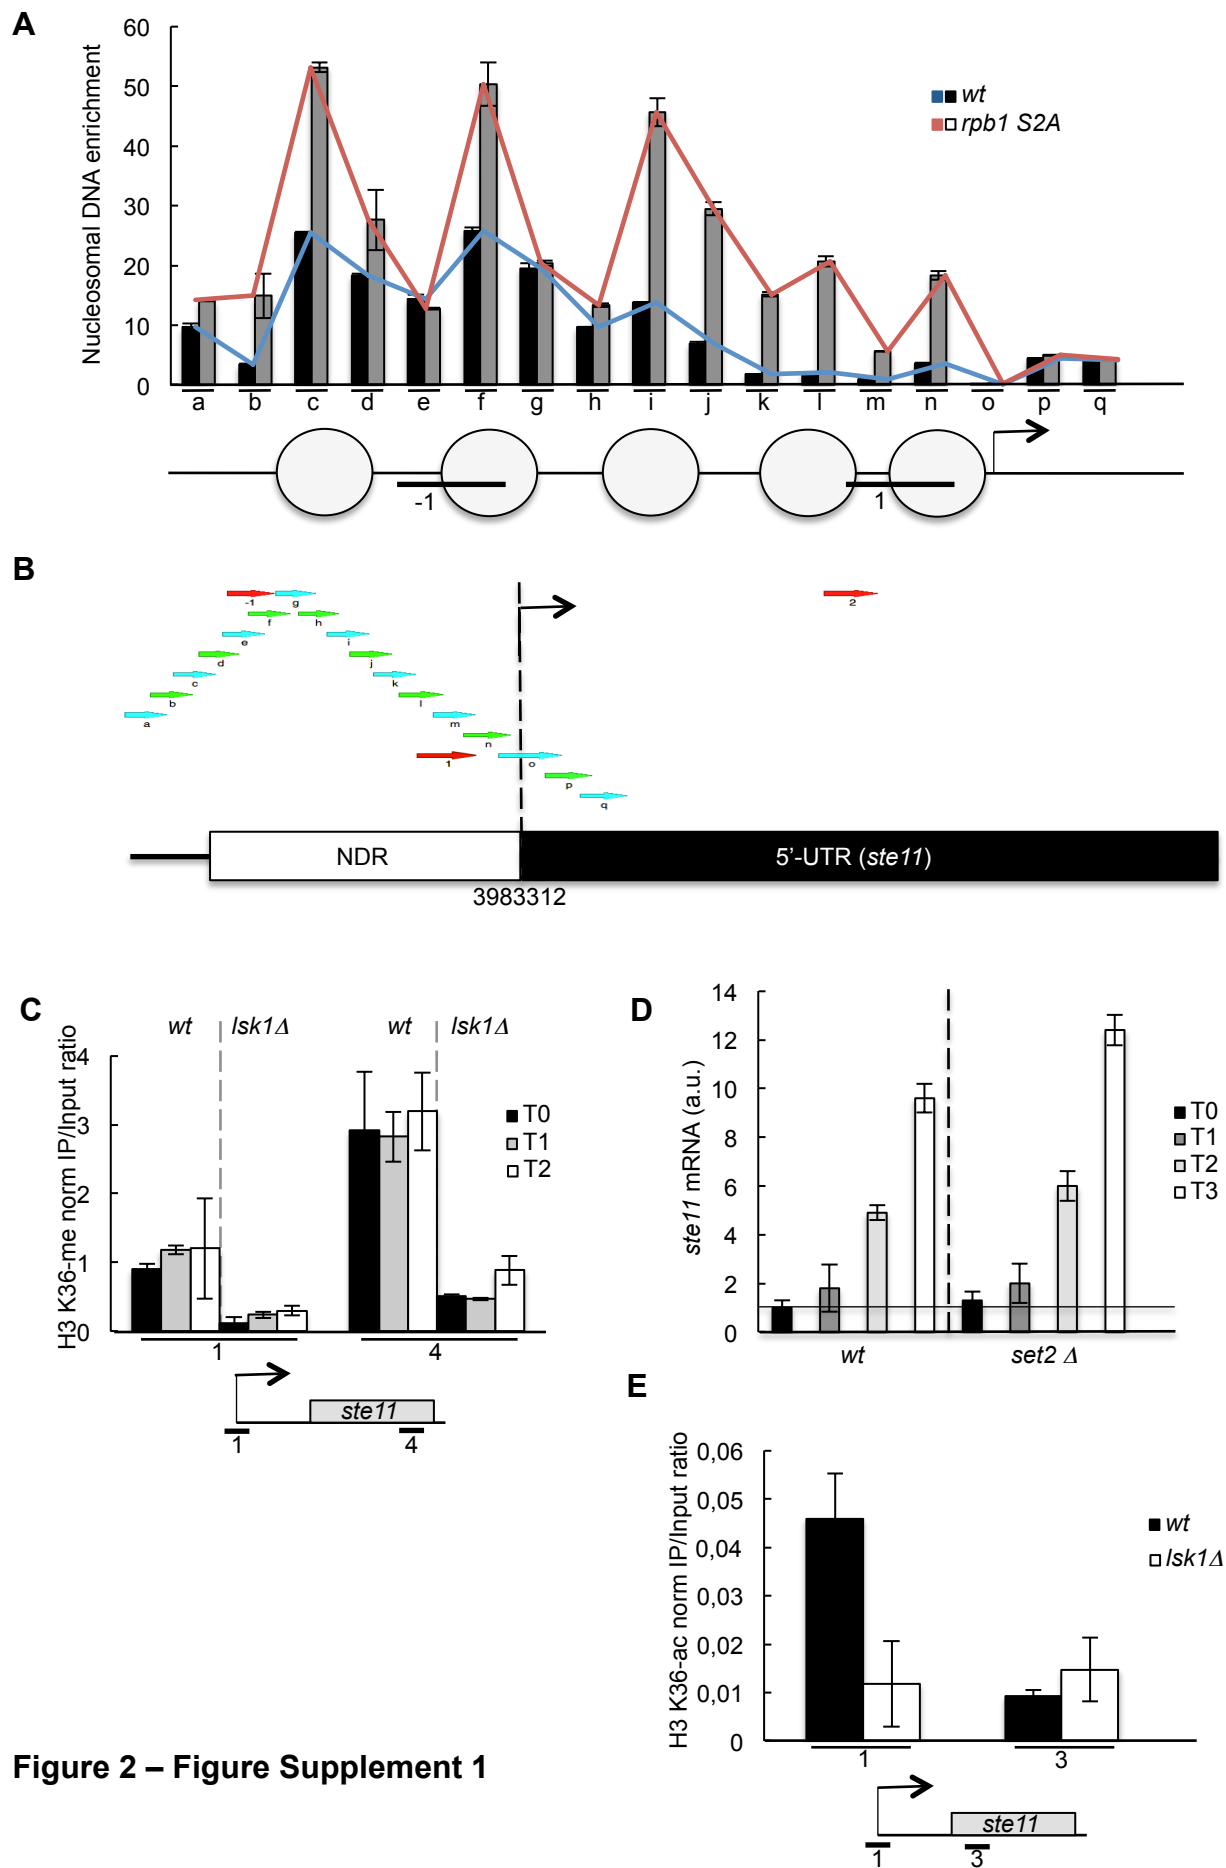

Figure 2 – Figure Supplement 1

Supplement: supp [file elife-09008-supp-v1.zip]
